# Supplementary material
Source: publisher figshare collection journal article supplement (https://gsapubs.figshare.com/ndownloader/files/23313491)
Supplement: Supplementary file 1 [file 23313491]

## Sheet: Sheet1
Nelson, L.L., Strauss, J.V., Crockford, P.W., Cox, G.M., Johnson, B.G., Ward, W., Colpron, M., McClelland, W.C, and Macdonald, F.A., 2018, Geochemical constraints on the provenance of pre-Mississippian sedimentary rocks in the North Slope subterrane of Yukon and Alaska, in Piepjohn, K., Strauss, J.V., Reinhardt, L., and McClelland, W.C., eds., Circum-Arctic Structural Events: Tectonic Evolution o…
GSA Data Repository Item 2018379
TABLE DR1. MAJOR AND TRACE ELEMENT DATA FROM PRE-MISSISSIPPIAN ROCKS IN THE NORTH SLOPE OF YUKON AND ALASKA
Element	Detection	J1332	J1311	J1355	J1348	J1331	J1328	J1329	J1338	13MC054	13MC079	J1353	J1471	J1473	J1474	J1314	J1316	J1324	J1321	J1320	J1318	J1340	13MC053	J1342	J1344	J1345	13MC050	13MC072	J1351	J1472	J1479	J1481	J1483
Al (%)	0.01	5.78	9.01	7.96	9.04	8.21	4.38	9.11	9.9	9.5	8.43	6.72	7.46	4.83	4.56	5.25	6.17	6.68	7.32	7.71	3.4	8.02	7.33	6.85	5.54	7.88	5.4	7.4	7.63	7.02	7.79	6.98	6.81
Ca (%)	0.01	0.22	0.4	0.12	0.05	0.08	0.05	0.09	0.05	0.1	0.07	3.94	0.19	0.03	0.04	0.97	1.33	0.07	0.22	0.22	0.06	0.24	0.2	0.23	0.25	0.29	0.01	0	0.21	0.16	0.14	0.22	0.33
Fe (%)	0.01	7.18	5.4	8.57	6.24	4.7	3.22	5.32	4.22	4.32	4.61	8.73	4.47	1.14	2.64	7.78	9.21	3.57	3.99	4.14	2.69	4.56	4.44	4.73	4.73	3.45	1.02	0.2	4.78	3.99	4.63	4.59	4.01
K (%)	0.01	0.69	2.33	2.08	2.66	2.3	1.13	2.81	2.07	1.98	2.14	0.81	3.61	1.81	1.9	1.58	1.53	2.62	2.28	2.76	1.04	1.89	2.42	1.41	0.64	2.84	2.74	2.91	2.07	2.14	2.15	1.61	2.07
Mg (%)	0.01	1.66	1.91	1.93	1.28	1.14	0.63	0.99	1.28	1.18	0.73	5.53	0.8	0.42	0.54	1.59	3.01	1.22	1.57	1.57	0.78	1.76	1.6	1.41	1.66	1.43	0.45	0.26	1.96	1.62	2.05	2.38	1.59
Na (%)	0.01	0.51	1.21	0.32	0.68	1.1	0.41	0.67	0.97	1.22	0.3	1.14	0.49	0.05	0.03	1.82	2.5	0.49	1.06	0.85	0.34	1.12	0.94	1.35	1.48	0.66	0.03	0.08	1.58	1.06	1.31	1.73	0.74
P (%)	0.005	0.023	0.051	0.051	0.035	0.042	0.028	0.051	0.027	0.04	0.032	0.198	0.027	0.016	0.016	0.418	0.44	0.038	0.092	0.08	0.018	0.094	0.084	0.112	0.074	0.091	0.022	0.023	0.079	0.1	0.07	0.063	0.124
S (%)	0.01	0	0	0.01	0	0	0	0	0	0	0	0	0	0.02	0	0	0	0	0.03	0.03	0.12	0.03	0.02	0.03	0.09	0.02	0	0.02	0	0.04	0.01	0.02	0.16
Ti (%)	0.01	0.18	0.32	0.43	0.47	0.34	0.24	0.54	0.36	0.36	0.37	1.77	0.37	0.21	0.17	2.31	2.89	0.29	0.37	0.4	0.15	0.42	0.36	0.34	0.24	0.39	0.29	0.39	0.37	0.29	0.31	0.32	0.23
Ag (ppm)	0.02	0.04	0.04	0.07	0.03	0.03	0.02	<0.02	<0.02	<0.02	<0.02	0.15	0.07	0.03	0.02	0.26	0.23	0.04	0.16	0.11	0.4	<0.02	0.11	0.16	0.13	0.12	0.06	0.03	0.05	0.15	0.08	0.1	0.14
Ba (ppm)	1	121	461	466	894	1230	324	832	668	238	588	229	562	759	195	606	767	775	1880	2040	1780	953	1750	1590	352	1630	752	4080	634	804	758	2720	686
Cr (ppm)	1	42	72	70	64	57	39	77	62	63	56	225	43	22	31	210	169	54	114	95	55	118	95	79	88	93	36	103	84	127	113	165	79
Cu (ppm)	0.5	5.8	14.3	25.4	29.6	19.9	4.9	11.2	29	19.7	11.9	76.5	13	24	15.1	94	30.3	48.1	30	43.4	62.3	53.6	45.8	30.3	32	49.5	20.2	3	68.7	48.1	53.2	57.3	66.7
Li (ppm)	1	160	104	105	105	75	47	76	87	91	23	16	7	17	17	23	44	33	42	40	20	59	43	55	51	33	13	10	51	44	46	44	52
Mn (ppm)	2	1560	325	874	132	187	212	423	177	526	223	1410	425	25	509	349	685	530	111	194	65	164	222	170	222	238	37	24	546	259	407	242	203
Ni (ppm)	0.5	45.9	51	58.5	46	33.9	28.4	51.8	33.3	38.8	30.5	163	31.8	24.8	25.5	144	158	37.1	64.8	62.7	40.1	71.7	62	58.9	80.2	53.1	9.1	1	59.2	71.6	72.9	90.6	63.6
Sr (ppm)	0.5	50.9	138	44.9	83.6	59.7	28.6	57.8	82.8	53	60.3	102	21.2	95.5	48.1	292	359	29.1	132	56.4	35.3	62.2	56.2	81.8	64.4	67.6	31.6	429	77.6	40	29	34	41.1
V (ppm)	2	47	90	89	100	74	36	113	79	77	60	256	62	76	43	157	215	83	127	141	100	166	136	133	85	160	69	320	127	190	146	155	187
Zn (ppm)	1	105	122	169	94	79	72	104	85	82	61	103	33	21	27	98	112	83	98	105	65	111	109	147	133	102	11	8	109	80	101	79	101
As (ppm)	1	2	3	2	1	<1	3	2	5	2	<1	3	4	1	<1	4	2	6	8	6	7	6	5	9	8	4	5	2	2	15	8	4	8
Be (ppm)	0.1	1	2.3	1.6	2.9	2.3	0.8	2.2	1.6	1.6	1.8	1.2	2.4	1.9	1.4	2.6	2.1	2.4	2	2.5	1.7	1.3	2.3	1.7	0.8	2.7	1.8	1.7	2.4	1.8	2.1	2.1	2
Bi (ppm)	0.04	0.19	0.13	0.13	0.27	0.22	0.22	0.11	0.29	0.22	0.22	<0.04	0.41	0.55	0.04	0.12	0.09	0.2	0.31	0.24	0.17	0.19	0.22	0.12	0.08	0.26	0.24	0.14	0.28	0.28	0.26	0.2	0.25
Cd (ppm)	0.02	<0.02	0.04	0.06	<0.02	<0.02	<0.02	0.03	0.04	<0.02	<0.02	0.04	<0.02	0.04	0.05	<0.02	0.07	0.16	0.14	0.11	0.1	0.08	0.13	0.18	0.2	0.08	<0.02	<0.02	<0.02	0.15	0.05	0.06	0.14
Co (ppm)	0.1	27.3	21.4	24.8	17	16.6	23.7	23.8	12.4	16	14.8	51.2	16.1	13.8	12.1	30.9	46.5	17	12.5	14.5	14.9	13.9	16.6	13.9	21.8	13.9	3.6	2.5	21.4	9.3	21	21.9	13.4
Cs (ppm)	1	2	3	5	5	3	1	4	5	2	4	<1	5	6	5	4	2	4	6	6	2	6	8	4	2	9	7	2	6	3	5	5	4
Ga (ppm)	0.1	15.3	23.5	22.9	25.8	23.4	11.1	25	26.6	25	22.7	22	22.3	15	9.6	19.7	23.4	17.8	18.6	20.1	9.6	20	19.3	15.4	10.7	21.4	15.7	24.6	19.6	19.3	21.5	18.2	19.7
In (ppm)	0.02	0.04	0.06	0.07	0.09	0.08	0.02	0.08	0.06	0.07	0.05	0.1	0.07	0.04	0.03	0.13	0.14	0.07	0.08	0.08	0.04	0.06	0.08	0.06	0.05	0.08	0.05	0.06	0.08	0.07	0.06	0.07	0.06
Mo (ppm)	0.05	0.23	0.18	0.27	0.43	0.09	0.2	0.28	0.24	0.24	0.51	1.24	0.34	0.18	0.11	0.56	0.59	0.15	0.52	0.47	0.09	0.51	0.47	0.76	0.81	0.36	1.23	1.85	0.16	1.72	0.29	0.24	0.73
Rb (ppm)	0.2	38.4	90.2	89.5	126	111	59.1	141	112	95.6	115	15.4	141	84.2	53.4	43.4	30	110	92.2	110	46.3	93.7	101	61.3	29	124	128	74.3	84	91.5	103	56.2	95.6
Sb (ppm)	0.05	0.06	0.28	0.19	0.79	0.07	0.13	0.3	0.2	0.09	0.35	0.09	0.87	0.36	<0.05	1.01	0.7	0.46	0.65	0.61	1.22	0.42	0.53	0.75	0.48	0.46	2.08	5.29	0.19	1.96	0.43	0.48	0.83
Se (ppm)	2	<2	<2	<2	<2	<2	<2	<2	<2	<2	<2	<2	<2	<2	<2	<2	<2	<2	<2	<2	<2	<2	<2	<2	<2	<2	<2	<2	<2	<2	<2	<2	<2
Sn (ppm)	0.3	1.2	1.9	1.7	2.9	2.4	0.8	2.4	2.1	2.2	2	1.7	4	1.5	0.9	2.8	3.4	2.1	1.6	2	1	1.4	1.9	1.2	0.7	2.1	1.9	3	1.6	1.7	1.8	1.6	1.8
Te (ppm)	0.05	<0.05	<0.05	<0.05	0.05	<0.05	<0.05	<0.05	<0.05	<0.05	<0.05	<0.05	<0.05	0.08	<0.05	0.06	0.09	0.05	0.06	0.05	0.11	<0.05	0.06	<0.05	<0.05	0.06	0.08	<0.05	0.12	0.07	<0.05	<0.05	<0.05
Tl (ppm)	0.02	0.17	0.51	0.47	0.66	0.57	0.31	0.75	0.61	0.43	0.73	<0.02	0.66	0.4	0.24	0.1	0.06	0.51	0.5	0.57	0.25	0.45	0.55	0.38	0.16	0.65	0.75	0.82	0.43	0.46	0.49	0.28	0.49
Zr (ppm)	0.5	43.5	57.3	60.5	91.3	69.8	51.3	89.8	101	94.3	79.2	192	69.5	61.3	45.3	141	166	60.5	74.3	83	37	91	83.6	82.5	48.7	92.3	66.5	115	84.9	87.4	85	77.2	80.8
Hf (ppm)	0.02	1.27	2.21	1.75	2.37	1.92	1.36	2.37	2.8	2.82	2.24	4.68	1.64	1.01	0.11	2.68	3.29	1.44	1.97	2.18	0.83	2.33	2.21	2.21	1.22	2.46	1.8	3.13	2.14	1.87	2.11	1.86	2.19
Nb (ppm)	0.1	6.4	10.9	15.9	15.8	14	8.8	19.1	14.8	16.9	14.4	39.7	15	5	<0.1	76	78.1	9.1	8.9	12.2	3.5	10.2	10.1	8.2	5	11.6	8.9	9.8	8.1	4.5	9.6	5.6	7.8
Ta (ppm)	0.05	0.54	1.05	1	1.35	1.21	0.65	1.38	1.04	1.37	1.13	2.69	1.22	0.13	<0.05	4.76	5.16	0.6	0.7	0.82	0.23	0.65	0.73	0.57	0.33	0.85	0.65	0.68	0.6	0.35	0.65	0.27	0.31
Th (ppm)	0.2	9.7	17.2	11.9	17	14.8	9.1	16.2	16.5	15	14.1	2.7	13.8	6.6	4.4	6.1	4.2	8.3	9	10.6	4.3	7	10	8.7	4.4	11.1	7.7	9.6	7.6	6.6	8.8	6.3	7.6
U (ppm)	0.05	1.16	1.52	2.07	2.11	1.34	1.25	2.2	1.65	1.95	1.65	0.97	1.64	1.24	0.16	2.37	1.44	1.67	2.39	2.43	0.86	2.13	2.54	2.48	1.55	2.77	1.69	3.94	2.07	2.32	2.19	2.39	3.63
Pb (ppm)	0.5	23.2	9	56	5.5	6.7	5.8	9.7	7.1	25.1	9.6	2	16	14.4	1.5	11.7	9.9	7	16.5	13.2	9.6	5.8	11.3	12.4	22	11.9	12.6	17.7	4.5	18.7	10.4	6.9	9.1
W (ppm)	0.1	20.6	12.5	11.3	9.1	14.4	71.3	10.9	1.3	1.4	1.5	4.2	26.3	63.1	11.2	51.6	39.9	12.3	18.3	19.8	70.8	1.1	29.9	21.1	67.4	12.7	23	22.3	10	26.8	27.6	21	17.9
Y (ppm)	0.1	9.2	15.7	21	19.1	14.2	9.2	17	15.4	15.4	15.2	25.9	13.7	8.3	3.8	26.6	21.2	12	15.9	18.2	9.5	17.7	19.5	20	13.8	19	15.6	16.2	19.2	12	13.1	10.7	14.2
Sc (ppm)	0.5	7.5	14	14.1	18	15.6	5	16.7	14	15	12.8	29.9	16.6	11.2	7	20.5	18.8	13.3	14.7	16.1	7.5	16.8	15.4	14.8	8.7	17.3	12.1	22.1	17.8	16.5	19.4	18.3	15.4
La (ppm)	0.1	27.3	50.1	28.4	46.2	38.4	14.7	36.1	61.1	48	36.2	30.4	43	23.2	10.8	85.4	61.5	26.6	25.2	29.5	15.7	26.7	27.1	25.1	11.6	32.7	24.9	16	24.9	25.5	28.7	19.3	15.2
Ce (ppm)	0.05	51	99.4	55.7	98.8	74.9	29	73.6	114	89.6	71.2	67.3	102	79.2	23.8	170	126	50.1	53.3	58.9	28.6	53.9	55.1	46.8	25.4	65.5	51.3	26.8	50.3	56.7	66	44	34.2
Pr (ppm)	0.05	6.45	13.5	7.29	11	8.74	3.59	8.8	12.9	10.4	7.99	9.16	9.24	7.13	2.51	20.8	16.1	6.74	6.9	7.77	4.25	6.6	7.24	6.48	3.41	8.34	6.08	2.9	6.4	6.41	7.41	4.89	4.48
Nd (ppm)	0.1	20.4	43.6	25	34.7	28.8	11.9	28.5	46.8	39.3	29.8	33.4	33.9	28.6	9.3	74.5	59.6	22.6	23.6	25.5	14	26.5	24.6	22.1	13.7	27.2	20.1	9	22.1	25.1	27.9	19.5	19
Sm (ppm)	0.05	3.47	7.72	5.61	6.4	5.18	2.35	5.32	7.9	6.71	5.32	7.03	5.64	5.6	1.76	15.4	12.6	4.32	4.59	4.9	2.67	5.15	4.79	4.61	3.65	5.11	3.85	1.97	4.56	4.49	4.85	3.75	4.41
Eu (ppm)	0.05	0.75	1.62	1.43	1.39	1.22	0.6	1.26	1.5	1.34	1.24	2.51	1.15	1.19	0.36	4.83	4.29	0.96	1.23	1.3	0.75	1.28	1.23	1.39	0.96	1.35	0.92	0.97	1.15	0.98	1.15	1.05	1.05
Gd (ppm)	0.05	3.04	6.39	5.56	5.39	4.19	2.31	4.83	5.88	5.44	4.84	7.22	4.7	3.8	1.42	13.9	11.8	4.04	4.06	4.51	2.57	4.71	4.5	4.72	3.57	4.68	3.63	2.43	4.47	3.83	4.17	3.39	4.05
Tb (ppm)	0.05	0.46	0.79	0.87	0.84	0.64	0.35	0.74	0.7	0.71	0.68	1.2	0.65	0.46	0.18	1.87	1.53	0.57	0.65	0.74	0.4	0.67	0.77	0.75	0.57	0.75	0.59	0.45	0.74	0.54	0.55	0.44	0.55
Dy (ppm)	0.05	1.73	3.34	3.54	3.69	2.53	1.55	3.11	3.19	3.2	3.23	4.94	3.4	2.09	0.94	7.8	6.58	2.37	2.75	3.2	1.78	3.44	3.19	3.38	2.44	3.28	2.45	2.26	3.37	2.87	2.8	2.32	3
Ho (ppm)	0.05	0.33	0.69	0.74	0.78	0.52	0.32	0.66	0.6	0.63	0.63	0.99	0.6	0.36	0.15	1.43	1.19	0.49	0.59	0.66	0.4	0.7	0.68	0.7	0.49	0.73	0.51	0.55	0.74	0.51	0.52	0.44	0.55
Er (ppm)	0.05	0.84	1.71	1.75	1.86	1.34	0.78	1.63	1.74	1.75	1.71	2.23	1.75	0.98	0.39	2.97	2.49	1.31	1.55	1.68	1.08	2.05	1.76	1.78	1.15	1.95	1.45	1.55	1.94	1.5	1.56	1.4	1.7
Yb (ppm)	0.1	0.8	1.5	1.6	2	1.3	0.8	1.7	1.7	1.7	1.7	1.7	1.7	1	0.3	1.3	1	1.4	1.6	1.9	1.1	2.1	2	1.8	1.2	2.1	1.5	1.9	2.1	1.6	1.6	1.5	1.8
Lu (ppm)	0.01	0.14	0.25	0.25	0.33	0.22	0.13	0.28	0.25	0.25	0.24	0.24	0.24	0.13	0.04	0.16	0.14	0.24	0.27	0.32	0.19	0.32	0.33	0.31	0.19	0.36	0.26	0.35	0.35	0.23	0.23	0.23	0.27
LOI (%)	N/A	3.53723	4.03107	4.33477	3.85817	3.04514	1.74633	3.40369	3.69313	3.28695	2.90363	7.84109	1.49053	1.78737	2.27119	1.92414	2.92803	2.8674	4.05984	3.87147	2.02457	3.58938	4.00859	3.59757	2.65113	4.2951	2.39795	3.56316	3.45142	3.18542	2.79729	2.53823	4.66383
